# Supplementary material
Source: MDPI journal article supplement (https://www.mdpi.com/1996-1073/13/10/2565)
Supplement: s1 [file s1]

## Sheet: Administrative
# Administrative divisions of South Korea
Short Name	Full Name	High-level division
SU	Seoul	Special City
IC	Incheon	Metropolitan City
DJ	Daejeon	Metropolitan City
DG	Daegu	Metropolitan City
GJ	Gwangju	Metropolitan City
BS	Busan	Metropolitan City
US	Ulsan	Metropolitan City
GG	Gyeonggi-do	Province
GW	Gangwon-do	Province
CB	Chungcheongbuk-do	Province
CN	Chungcheongnam-do	Province
JB	Jeollabuk-do	Province
JN	Jeollanam-do	Province
GB	Gyeongsangbuk-do	Province
GN	Gyeongsangnam-do	Province
JJ	Jeju	Special Self-Governing Province
SJ	Sejong	Special Autonomous City

## Sheet: Population
# Title: Population projection by province
# Unit: Thous. Persons
# ----------
Province	1990	2005	2010	2015	2020	2025	2030	2035	2040	2045	2050	2055	2060	2065	2070	2075	2080	2085	2090	2095	2100
SU	10473	10029	10089	9941	9635	9545	9429	9264	9063	8813	8737	8622	8559	8448	8349	8169	8001	7807	7639	7472	7348
IC	1897	2581	2723	2883	2979	3080	3152	3187	3180	3136	3109	3068	3046	3006	2971	2907	2847	2778	2718	2659	2615
DJ	1036	1470	1515	1542	1522	1541	1556	1560	1549	1524	1511	1491	1480	1461	1443	1412	1383	1350	1321	1292	1270
DG	2293	2509	2480	2469	2446	2409	2367	2315	2244	2154	2135	2107	2092	2065	2040	1996	1955	1908	1867	1826	1796
GJ	1125	1445	1494	1506	1496	1491	1479	1458	1423	1377	1365	1347	1337	1320	1305	1276	1250	1220	1194	1168	1148
BS	3803	3590	3477	3452	3396	3342	3281	3206	3104	2978	2952	2913	2892	2855	2821	2760	2704	2638	2581	2525	2483
US	1071	1071	1099	1164	1172	1185	1188	1177	1151	1113	1103	1089	1081	1067	1054	1031	1010	986	964	943	928
GG	5972	10625	11619	12423	13221	13645	13901	13970	13846	13556	13440	13262	13165	12995	12842	12565	12307	12009	11750	11494	11303
GW	1562	1489	1489	1517	1532	1550	1569	1583	1584	1568	1555	1534	1523	1503	1485	1453	1424	1389	1359	1329	1307
CB	1374	1485	1524	1589	1630	1673	1710	1733	1737	1721	1707	1684	1672	1650	1631	1596	1563	1525	1492	1459	1435
CN	1992	1918	2078	2103	2204	2291	2363	2411	2430	2421	2400	2368	2351	2320	2293	2244	2198	2144	2098	2052	2018
JB	2047	1817	1796	1835	1824	1815	1810	1800	1778	1739	1725	1702	1689	1667	1648	1612	1579	1541	1508	1475	1450
JN	2480	1851	1777	1797	1794	1787	1787	1785	1770	1741	1726	1703	1690	1669	1649	1613	1580	1542	1509	1476	1451
GB	2736	2652	2630	2678	2685	2691	2694	2683	2649	2588	2566	2532	2514	2481	2452	2399	2350	2293	2244	2195	2158
GN	2776	3110	3217	3330	3386	3414	3425	3405	3347	3254	3226	3183	3160	3119	3083	3016	2954	2882	2820	2759	2713
JJ	509	542	548	599	676	723	759	786	800	804	797	787	781	771	762	745	730	712	697	682	670

## Sheet: GDP
# Title: GRDP (Market exchange rate) by province
# Unit: Million1990 USD
# ----------
Province	1990	2005	2010	2015	2020	2025	2030	2035	2040	2045	2050	2055	2060	2065	2070	2075	2080	2085	2090	2095	2100
SU	66072.3	141292	165344	179066	183067	184461	188518	194610	200585	205336	208633	210866	212547	214159	216110	218510	221228	224036	226714	229435	231993
IC	12788.2	28332.6	34653.9	37534.4	38374.8	38670.5	39517.2	40798.1	42042.5	43036.9	43728.6	44195.3	44553.9	44884.3	45296.6	45800.6	46366.7	46955.9	47513.3	48091.1	48629.7
DJ	5926	13113.6	15767.5	17072.7	17463.2	17587.7	17977.5	18564.5	19130.6	19587.8	19904.2	20115.6	20274.6	20431	20604.6	20835.1	21094.8	21371.1	21627.4	21884.9	22119.2
DG	10888.7	19730.6	22013.8	23842.2	24370	24559.7	25097.4	25912	26707.1	27340.8	27774.2	28072.7	28302	28518.4	28766.9	29086.1	29448.6	29828.8	30186.3	30545.5	30891.2
GJ	5539.37	12334.4	15066.6	16314.6	16676.8	16803	17174.7	17735.6	18267.7	18705.2	19003.8	19206.6	19357.5	19509.3	19694.1	19899.4	20150.8	20411.8	20660.1	20909.9	21131.7
BS	18091.4	32467.5	36379.8	39395	40277.2	40589.1	41472	42821.4	44128.9	45177.6	45898	46386.8	46761.4	47124.3	47544.4	48069.4	48680.9	49290.8	49875.5	50482.6	51043.4
US	-	19539	25190.8	27290.5	27885.8	28103.6	28719.9	29650.2	30563.3	31293.2	31784.1	32139.4	32394.5	32640.7	32922.5	33279.3	33700	34144.8	34524.9	34942	35356.3
GG	42015.5	119169	152111	164745	168434	169721	173442	179051	184556	188913	191959	193997	195542	197036	198820	201026	203533	206124	208578	211097	213446
GW	8878.76	15111.5	17480.1	18934.1	19353.8	19501.1	19926.4	20569.8	21205.7	21706.3	22062.2	22290.6	22471.4	22638	22838.3	23092.3	23393.9	23682.9	23964	24246.4	24517.7
CB	7678.02	17698	22526.1	24397.8	24951.1	25139.1	25693.7	26519.4	27329.1	27977.3	28440.5	28735.7	28970.1	29184.2	29456.1	29786.4	30153.4	30534.2	30895.4	31258	31611.2
CN	9434.29	32910.5	47473.1	51411.5	52557.5	52951.5	54117.7	55874.4	57581.8	58960.7	59904.3	60534.8	61025.4	61474.6	62039.7	62741	63525.6	64310.9	65083.9	65860.7	66596.8
JB	8264.42	17046.1	20905.8	22638.9	23151.9	23317.8	23838.3	24604.2	25365.4	25954.7	26386.7	26664.4	26868	27070.2	27325.7	27621.2	27967.4	28327.7	28669.4	29012.8	29325.7
JN	12334.5	27533.9	34181.8	37034.8	37863.2	38136	38970.7	40250.8	41468.9	42466.3	43148.5	43603	43936.2	44293.7	44685.2	45169	45735.8	46325.7	46885.2	47447.5	47959.8
GB	17511.5	39660.5	46118.5	49962.1	51077.1	51468.3	52598.5	54291.5	55965.1	57280.7	58207.6	58825.2	59306.1	59746.3	60292.4	60958.6	61725.6	62508.7	63265.6	64026.5	64723.2
GN	20870.9	40663.6	49875.2	54019.3	55230.5	55645.5	56882.2	58720.2	60517.2	61956.4	62952.4	63615.2	64127.7	64613.6	65213.8	65926.6	66747.1	67585.7	68394	69231.1	69997.5
JJ	2432.66	5299.68	6227.49	6740.95	6889.9	6950.28	7098.61	7333.14	7550.74	7733.39	7856.9	7945.92	8006.73	8068.78	8142.66	8226.8	8332.78	8435.02	8539.79	8645.29	8732.79
# Title: GRDP (Market exchange rate) per capita by province
# Unit: Thous. 90 USD per capita
# ----------
Province	1990	2005	2010	2015	2020	2025	2030	2035	2040	2045	2050	2055	2060	2065	2070	2075	2080	2085	2090	2095	2100
SU	6.30882	14.0883	16.3886	18.0129	19.0002	19.3254	19.9935	21.0071	22.1323	23.2993	23.8793	24.4567	24.8332	25.3502	25.8845	26.7487	27.65	28.6969	29.6785	30.706	31.5723
IC	6.74125	10.9774	12.7264	13.0192	12.8818	12.5554	12.5372	12.8014	13.2209	13.7235	14.0652	14.4053	14.627	14.9316	15.2462	15.7553	16.2862	16.9028	17.481	18.0862	18.5964
DJ	5.72008	8.92078	10.4076	11.0718	11.4739	11.4132	11.5537	11.9003	12.3503	12.8529	13.1728	13.4914	13.6991	13.9843	14.279	14.7558	15.2529	15.8304	16.372	16.9388	17.4167
DG	4.74868	7.86395	8.87652	9.65664	9.9632	10.195	10.603	11.1931	11.9015	12.693	13.009	13.3236	13.5287	13.8103	14.1014	14.5722	15.0632	15.6335	16.1683	16.7281	17.2
GJ	4.92388	8.53591	10.0847	10.8331	11.1476	11.2696	11.6124	12.1643	12.8374	13.584	13.9222	14.2588	14.4783	14.7798	15.0913	15.5951	16.1206	16.731	17.3033	17.9023	18.4074
BS	4.75713	9.04388	10.463	11.4122	11.8602	12.1451	12.64	13.3567	14.2168	15.1705	15.5481	15.9241	16.1692	16.5059	16.8537	17.4164	18.0033	18.6849	19.3241	19.9931	20.5572
US	-	18.2437	22.9216	23.4455	23.7934	23.7161	24.175	25.1913	26.5537	28.1161	28.816	29.5128	29.9671	30.5911	31.2358	32.2787	33.3663	34.6296	35.8142	37.0541	38.0995
GG	7.03542	11.2159	13.0915	13.2613	12.7399	12.4383	12.4769	12.8168	13.3292	13.9357	14.2826	14.628	14.8532	15.1624	15.482	15.9989	16.538	17.1641	17.7513	18.3658	18.884
GW	5.68423	10.1487	11.7395	12.4813	12.6331	12.5813	12.7001	12.9942	13.3874	13.8433	14.1879	14.531	14.7547	15.0619	15.3793	15.8928	16.4283	17.0503	17.6336	18.2441	18.7588
CB	5.58808	11.9178	14.7809	15.3542	15.3074	15.0263	15.0256	15.3026	15.7335	16.2564	16.6611	17.064	17.3266	17.6874	18.0602	18.6632	19.292	20.0224	20.7074	21.4242	22.0287
CN	4.73609	17.1588	22.8456	24.4467	23.8464	23.1128	22.9021	23.1748	23.6962	24.3539	24.9601	25.5637	25.9572	26.4977	27.0561	27.9594	28.9015	29.9958	31.0219	32.0959	33.0014
JB	4.03733	9.38147	11.6402	12.3373	12.6929	12.8473	13.1703	13.669	14.2662	14.9251	15.2966	15.6665	15.9077	16.2389	16.5811	17.1347	17.7121	18.3827	19.0115	19.6697	20.2246
JN	4.97358	14.8751	19.2357	20.6092	21.1055	21.3408	21.8079	22.5494	23.4288	24.3919	24.9991	25.6036	25.9978	26.5391	27.0984	28.0031	28.9467	30.0426	31.0704	32.146	33.0529
GB	6.40039	14.9549	17.5355	18.6565	19.0231	19.1261	19.5243	20.2354	21.1269	22.1332	22.6842	23.2327	23.5903	24.0815	24.5891	25.41	26.2662	27.2607	28.1932	29.1693	29.9922
GN	7.51833	13.0751	15.5036	16.222	16.3114	16.2992	16.6079	17.2453	18.081	19.0401	19.5141	19.9859	20.2936	20.7161	21.1527	21.8589	22.5955	23.451	24.2532	25.0928	25.8008
JJ	4.77929	9.77801	11.364	11.2537	10.1922	9.61312	9.35259	9.3297	9.43842	9.61864	9.85809	10.0965	10.2519	10.4653	10.6859	11.0427	11.4148	11.8469	12.2522	12.6764	13.034

## Sheet: EB mapping
# Title: Provincial energy balance form
# Comment: Regional energy balance is a internal infromation, so data is removed.
# ----------
				Coal	Coal	Coal	Coal	Coal	Coal	Coal	Petroleum	Petroleum	Petroleum	Petroleum	Petroleum	Petroleum	Petroleum	Petroleum	Petroleum	Petroleum	Petroleum	Petroleum	Petroleum	Petroleum	Petroleum	Petroleum	Petroleum	Petroleum	Petroleum	Petroleum	Petroleum	Petroleum	L N G	City Gas	Hydro	Nuclear	Electricity	Heat	Renewable	Total
				Total	Anthracite	Anthracite	Anthracite	Bituminous	Bituminous	Bituminous	Total	Energy-use	Energy-use	Energy-use	Energy-use	Energy-use	Energy-use	Energy-use	Energy-use	Energy-use	Energy-use	LPG	LPG	LPG	Non-Energy use	Non-Energy use	Non-Energy use	Non-Energy use	Non-Energy use	Non-Energy use	Non-Energy use	Non-Energy use	L N G	City Gas	Hydro	Nuclear	Electricity	Heat	Renewable	Total
				Total	Total	Domestic-c	Import-c	Total	Coking-c	Steaming-c	Total	Total	Gasoline	Kerosene	Diesel	B - A	B - B	B - C	JA - 1	JP-4	AVI-G	Total	Propane	Butane	Total	Naphtha	Solvent	Asphalt	Lubricants	Para. -wax	Pet. -coke	Others	L N G	City Gas	Hydro	Nuclear	Electricity	Heat	Renewable	Total
Production
Total primary energy supply
	Transformation processes
	Electric generation
	Distric heating
	Gas manufacturing
	Own use and Losses
Total final consumption
	Industry
		Agriculture/forestry/Fishing
		Mining amd quarrying
		Mamufacturing
			Food amd tobacco
			Textile amd leather
			Wlld amd wood products
			Paper, pulp amd print
			Chemical amd petrochemical
			Non-metallic minerals
			Iron amd steel
			Non-ferrous metals
			Fabricated metal
			Other mamufacturing
			Other energy
			Construction
	Transport
		Rail
		Road
		Domestic navigation
		Domestic aviation
	Residential
	Commercial
	Public services
# Title: Mapping sector of KEEI EB to GCAM-Korea									# Title: Mapping fuel of KEEI EB to GCAM-Korea
# ----------									# ----------
			KEEI Sector	GCAM-Korea sector					KEEI Fuel	GCAM-Korea Fuel
			Electric generation	electricity_input					Domestic-c	coal
			Agriculture/forestry/Fishing	industry					Import-c	coal
			Mining amd quarrying	industry					Coking-c	coal
			Food amd tobacco	industry					Steaming-c	coal
			Textile amd leather	industry					Gasoline	refined liquids
			Wlld amd wood products	industry					Kerosene	refined liquids
			Paper, pulp amd print	industry					Diesel	refined liquids
			Chemical amd petrochemical	industry					B - A	refined liquids
			Non-metallic minerals	industry					B - B	refined liquids
			Iron amd steel	industry					B - C	refined liquids
			Non-ferrous metals	industry					JA - 1	refined liquids
			Fabricated metal	industry					JP-4	refined liquids
			Other mamufacturing	industry					AVI-G	refined liquids
			Other energy	industry					Propane	refined liquids
			Construction	industry					Butane	refined liquids
			Rail	trn_rail					Naphtha	refined liquids (petchem feed)
			Road	trn_road					Solvent	refined liquids (petchem feed)
			Domestic navigation	trn_ship					Asphalt	refined liquids (const feed)
			Domestic aviation	trn_air					Lubricants	refined liquids (petchem feed)
			Residential	resid					Para. -wax	refined liquids (petchem feed)
			Commercial	comm					Pet. -coke	refined liquids (petchem feed)
			Public services	comm					Others	refined liquids (petchem feed)
									L N G	gas
									City Gas	gas
									Hydro	hydro
									Nuclear	nuclear
									Electricity	electricity
			# Title: Disaggregation of use of CNG (In transportation sector, CNG is consumed in two modes, passenger car and bus)						# Title: Renewable disaggregation
			# ----------						# ----------
			KEEI Sector	Disaggregation	GCAM-Korea sector				KEEI Fuel	Disaggregation	GCAM-Korea Fuel
			Road	Road_CNG_car	trn_car_CNG				Renewable	biomass_from_Renewable	biomass
				Road_CNG_bus	trn_bus_CNG					solar PV_from_Renewable	solar
										solar CSP_from_Renewable	solar
										wind_from_Renewable	wind
										geothermal_from_Renewable	geothermal
										biomass_from_Industry	biomass
									# Title: Heat disaggregation (Heat is recursively disaggregated into biomass, gas and refined liquids, which are the input energy to generate heat.)
									# ----------
									KEEI Fuel	Disaggregation	GCAM-Korea Fuel
									Heat	Heat_from_biomass	biomass
										Heat_from_gas	gas
										Heat_from_refined liquids	refined liquids

## Sheet: Refining
# Title: Refining Capacity by corporations
# Unit: BPSD (barrel per stream day)
# Source: https://www.petronet.co.kr
# ----------									Location
Corporation	SK-Energy	GS-Caltex	Incheon Refinery	Hyundai Oilbank	S-Oil	Total			SK: Sinyeocheon-ro, Nam-gu, Ulsan, Republic of Korea (http://www.skenergy.com)
1969	115	60	0	5	0	180			GS-Caltex: Jeongnyang-dong, Yeosu-si, Jeollanam-do, Republic of Korea (http://www.gscaltex.com)
1970	115	100	0	5	0	220			Incheon Refinery: Bongsu-daero, Seo-gu, Incheon, Republic of Korea ***Incheon Refinery was merged into SK in 2007.
1971	115	100	50	5	0	270			Hyundai Oilbank: Daejuk-ro, Daesan-eup, Seosan-si, Chungcheongnam-do, Republic of Korea (https://www.oilbank.co.kr)
1972	175	160	60	5	0	400			S-Oil: Onsan-ro, Onsan-eup, Ulju-gun, Ulsan, Republic of Korea (https://www.s-oil.com)
1974	215	160	60	5	0	440
1977	215	160	60	5	0	440
1978	280	230	60	10	0	580
1979	280	230	60	10	0	580
1980	280	230	60	10	60	640
1981	280	380	60	10	60	790
1983	280	380	60	10	60	790
1985	280	380	60	10	60	790
1988	280	380	60	10	60	790
1989	280	380	60	60	60	840
1990	280	380	60	60	60	840
1991	375	380	60	60	160	1035
1992	585	380	275	110	325	1675
1993	585	380	275	110	325	1675
1994	610	380	275	110	325	1700
1995	610	380	275	110	443	1818
1996	810	600	275	310	443	2438
1997	810	600	275	310	443	2438
1998	810	600	275	310	443	2438
1999	810	600	275	310	443	2438
2000	810	600	275	310	443	2438
2001	810	600	275	310	443	2438
2002	810	600	275	310	443	2438
2003	810	600	275	310	443	2438
2004	840	650	275	390	580	2735
2005	840	650	275	390	580	2735
2006	840	650	275	390	580	2735
2007	840	680	275	390	580	2765
2008	1115	700	0	390	580	2785
2009	1115	750	0	390	580	2835
2010	1115	760	0	390	580	2845
2011	1115	775	0	390	654	2934
2012	1115	775	0	390	669	2949
2013	1115	775	0	390	669	2949
2014	1165	785	0	390	669	3009
2015	1215	785	0	390	669	3059
2016	1215	785	0	390	669	3059
2017	1215	790	0	390	669	3064

## Sheet: T&D loss
# Title: T&D loss factor
# Units: %
# Source: KEPCO (2018) Statistics of Electric Power in Korea 2017
# ----------
state	1961	2000	2001	2002	2003	2004	2005	2006	2007	2008	2009	2010	2011	2012	2013	2014	2015	2016	2017
SU	29.35	4.71	4.5	4.48	4.43	4.46	4.51	4.02	3.99	4.01	4.07	3.99	3.69	3.57	3.73	3.69	3.6	3.59	3.57
IC	29.35	4.71	4.5	4.48	4.43	4.46	4.51	4.02	3.99	4.01	4.07	3.99	3.69	3.57	3.73	3.69	3.6	3.59	3.57
DJ	29.35	4.71	4.5	4.48	4.43	4.46	4.51	4.02	3.99	4.01	4.07	3.99	3.69	3.57	3.73	3.69	3.6	3.59	3.57
DG	29.35	4.71	4.5	4.48	4.43	4.46	4.51	4.02	3.99	4.01	4.07	3.99	3.69	3.57	3.73	3.69	3.6	3.59	3.57
GJ	29.35	4.71	4.5	4.48	4.43	4.46	4.51	4.02	3.99	4.01	4.07	3.99	3.69	3.57	3.73	3.69	3.6	3.59	3.57
BS	29.35	4.71	4.5	4.48	4.43	4.46	4.51	4.02	3.99	4.01	4.07	3.99	3.69	3.57	3.73	3.69	3.6	3.59	3.57
US	29.35	4.71	4.5	4.48	4.43	4.46	4.51	4.02	3.99	4.01	4.07	3.99	3.69	3.57	3.73	3.69	3.6	3.59	3.57
GG	29.35	4.71	4.5	4.48	4.43	4.46	4.51	4.02	3.99	4.01	4.07	3.99	3.69	3.57	3.73	3.69	3.6	3.59	3.57
GW	29.35	4.71	4.5	4.48	4.43	4.46	4.51	4.02	3.99	4.01	4.07	3.99	3.69	3.57	3.73	3.69	3.6	3.59	3.57
CB	29.35	4.71	4.5	4.48	4.43	4.46	4.51	4.02	3.99	4.01	4.07	3.99	3.69	3.57	3.73	3.69	3.6	3.59	3.57
CN	29.35	4.71	4.5	4.48	4.43	4.46	4.51	4.02	3.99	4.01	4.07	3.99	3.69	3.57	3.73	3.69	3.6	3.59	3.57
JB	29.35	4.71	4.5	4.48	4.43	4.46	4.51	4.02	3.99	4.01	4.07	3.99	3.69	3.57	3.73	3.69	3.6	3.59	3.57
JN	29.35	4.71	4.5	4.48	4.43	4.46	4.51	4.02	3.99	4.01	4.07	3.99	3.69	3.57	3.73	3.69	3.6	3.59	3.57
GB	29.35	4.71	4.5	4.48	4.43	4.46	4.51	4.02	3.99	4.01	4.07	3.99	3.69	3.57	3.73	3.69	3.6	3.59	3.57
GN	29.35	4.71	4.5	4.48	4.43	4.46	4.51	4.02	3.99	4.01	4.07	3.99	3.69	3.57	3.73	3.69	3.6	3.59	3.57
JJ	29.35	4.71	4.5	4.48	4.43	4.46	4.51	4.02	3.99	4.01	4.07	3.99	3.69	3.57	3.73	3.69	3.6	3.59	3.57

## Sheet: Auxiliary use
# Title: Auxiliary use factor
# Units: %
# Source: KEPCO (2018) Statistics of Electric Power in Korea 2017
# ----------
state	1961	2000	2001	2002	2003	2004	2005	2006	2007	2008	2009	2010
SU	5.04	4.71	4.61801	4.55	4.48	4.52	4.56436	4.18639	4.17048	4.186	4.29691	4.20286
IC	5.04	4.71	4.61801	4.55	4.48	4.52	4.56436	4.18639	4.17048	4.186	4.29691	4.20286
DJ	5.04	4.71	4.61801	4.55	4.48	4.52	4.56436	4.18639	4.17048	4.186	4.29691	4.20286
DG	5.04	4.71	4.61801	4.55	4.48	4.52	4.56436	4.18639	4.17048	4.186	4.29691	4.20286
GJ	5.04	4.71	4.61801	4.55	4.48	4.52	4.56436	4.18639	4.17048	4.186	4.29691	4.20286
BS	5.04	4.71	4.61801	4.55	4.48	4.52	4.56436	4.18639	4.17048	4.186	4.29691	4.20286
US	5.04	4.71	4.61801	4.55	4.48	4.52	4.56436	4.18639	4.17048	4.186	4.29691	4.20286
GG	5.04	4.71	4.61801	4.55	4.48	4.52	4.56436	4.18639	4.17048	4.186	4.29691	4.20286
GW	5.04	4.71	4.61801	4.55	4.48	4.52	4.56436	4.18639	4.17048	4.186	4.29691	4.20286
CB	5.04	4.71	4.61801	4.55	4.48	4.52	4.56436	4.18639	4.17048	4.186	4.29691	4.20286
CN	5.04	4.71	4.61801	4.55	4.48	4.52	4.56436	4.18639	4.17048	4.186	4.29691	4.20286
JB	5.04	4.71	4.61801	4.55	4.48	4.52	4.56436	4.18639	4.17048	4.186	4.29691	4.20286
JN	5.04	4.71	4.61801	4.55	4.48	4.52	4.56436	4.18639	4.17048	4.186	4.29691	4.20286
GB	5.04	4.71	4.61801	4.55	4.48	4.52	4.56436	4.18639	4.17048	4.186	4.29691	4.20286
GN	5.04	4.71	4.61801	4.55	4.48	4.52	4.56436	4.18639	4.17048	4.186	4.29691	4.20286
JJ	5.04	4.71	4.61801	4.55	4.48	4.52	4.56436	4.18639	4.17048	4.186	4.29691	4.20286

## Sheet: Nuclear
# Title: Estimation of nuclear capacity factor
# Unit: Unitless
# ----------
Average of Capacity factor	1990	2005	2010	2015	2020	2025	2030	2035	2040	2045	2050	2055	2060	2065	2070	2075	2080	2085	2090	2095	2100
	0.79271	0.945789	0.988138	0.866158	0.825286	0.813361	0.801436	0.789511	0.777586	0.765661	0.753736	0.741811	0.729886	0.717962	0.706037	0.694112	0.682187	0.670262	0.658337	0.646412	0.634487
# Title: Estimation of electricity production by nuclear reactor
# Unit: Capacity-MW, Electricity-MWh
# ----------
Province	Reactor	Capacity	1990	2005	2010	2015	2020	2025	2030	2035	2040	2045	2050	2055	2060	2065	2070	2075	2080	2085	2090	2095	2100
BS	gori1	587	3704930	4381600	5177866	4387606	0	0	0	0	0	0	0	0	0	0	0	0	0	0	0	0	0
BS	gori2	650	4614630	5456642	5341764	4700713	4.69918e+06	0	0	0	0	0	0	0	0	0	0	0	0	0	0	0	0
BS	gori3	950	7144872	7877184	9075614	7388924	6.86803e+06	0	0	0	0	0	0	0	0	0	0	0	0	0	0	0	0
BS	gori4	950	6501336	8725790	8482702	8868916	6.86803e+06	6.76879e+06	0	0	0	0	0	0	0	0	0	0	0	0	0	0	0
BS	singori1	1000	0	0	0	7932782	7.2295e+06	7.12504e+06	7.02058e+06	6.91612e+06	6.81165e+06	6.70719e+06	6.60273e+06	0	0	0	0	0	0	0	0	0	0
BS	singori2	1000	0	0	0	7779706	7.2295e+06	7.12504e+06	7.02058e+06	6.91612e+06	6.81165e+06	6.70719e+06	6.60273e+06	0	0	0	0	0	0	0	0	0	0
GB	hanul1	950	6529450	8638270	7790914	7771398	6.86803e+06	6.76879e+06	0	0	0	0	0	0	0	0	0	0	0	0	0	0	0
GB	hanul2	950	5849342	6906033	7882910	8833333	6.86803e+06	6.76879e+06	0	0	0	0	0	0	0	0	0	0	0	0	0	0	0
GB	hanul3	1000	0	8078371	9201393	9192720	7.2295e+06	7.12504e+06	7.02058e+06	6.91612e+06	0	0	0	0	0	0	0	0	0	0	0	0	0
GB	hanul4	1000	0	8422652	8545504	7729531	7.2295e+06	7.12504e+06	7.02058e+06	6.91612e+06	0	0	0	0	0	0	0	0	0	0	0	0	0
GB	hanul5	1000	0	7737089	8597095	9151574	7.2295e+06	7.12504e+06	7.02058e+06	6.91612e+06	6.81165e+06	0	0	0	0	0	0	0	0	0	0	0	0
GB	hanul6	1000	0	7495890	8425588	6820683	7.2295e+06	7.12504e+06	7.02058e+06	6.91612e+06	6.81165e+06	0	0	0	0	0	0	0	0	0	0	0	0
GB	sinhanul1	1400	0	0	0	0	1.01213e+07	9.97506e+06	9.82881e+06	9.68256e+06	9.53632e+06	9.39007e+06	9.24382e+06	9.09757e+06	8.95133e+06	8.80508e+06	8.65883e+06	8.51259e+06	0	0	0	0	0
GB	sinhanul2	1400	0	0	0	0	1.01213e+07	9.97506e+06	9.82881e+06	9.68256e+06	9.53632e+06	9.39007e+06	9.24382e+06	9.09757e+06	8.95133e+06	8.80508e+06	8.65883e+06	8.51259e+06	8.36634e+06	0	0	0	0
GB	sinwolsong1	1000	0	0	0	6565381	7.2295e+06	7.12504e+06	7.02058e+06	6.91612e+06	6.81165e+06	6.70719e+06	6.60273e+06	0	0	0	0	0	0	0	0	0	0
GB	sinwolsong2	1000	0	0	0	5478731	7.2295e+06	7.12504e+06	7.02058e+06	6.91612e+06	6.81165e+06	6.70719e+06	6.60273e+06	0	0	0	0	0	0	0	0	0	0
GB	wolsong1	679	5106228	4620162	0	3169905	0	0	0	0	0	0	0	0	0	0	0	0	0	0	0	0	0
GB	wolsong2	700	0	6016227	5989955	5357257	5.06065e+06	4.98753e+06	0	0	0	0	0	0	0	0	0	0	0	0	0	0	0
GB	wolsong3	700	0	6407130	6197850	5730058	5.06065e+06	4.98753e+06	0	0	0	0	0	0	0	0	0	0	0	0	0	0	0
GB	wolsong4	700	0	6030862	6033456	5303380	5.06065e+06	4.98753e+06	0	0	0	0	0	0	0	0	0	0	0	0	0	0	0
JN	hanbit1	950	7200582	8637865	8070514	7462895	6.86803e+06	6.76879e+06	0	0	0	0	0	0	0	0	0	0	0	0	0	0	0
JN	hanbit2	950	6235192	7615310	7723563	8270167	6.86803e+06	6.76879e+06	0	0	0	0	0	0	0	0	0	0	0	0	0	0	0
JN	hanbit3	1000	0	9122369	8354436	5281410	7.2295e+06	7.12504e+06	7.02058e+06	0	0	0	0	0	0	0	0	0	0	0	0	0	0
JN	hanbit4	1000	0	8171829	9186235	5688835	7.2295e+06	7.12504e+06	7.02058e+06	6.91612e+06	0	0	0	0	0	0	0	0	0	0	0	0	0
JN	hanbit5	1000	0	8203213	8961685	7417983	7.2295e+06	7.12504e+06	7.02058e+06	6.91612e+06	6.81165e+06	0	0	0	0	0	0	0	0	0	0	0	0
JN	hanbit6	1000	0	8234535	8434710	8487248	7.2295e+06	7.12504e+06	7.02058e+06	6.91612e+06	6.81165e+06	0	0	0	0	0	0	0	0	0	0	0	0
US	singori3	1400	0	0	0	0	1.01213e+07	9.97506e+06	9.82881e+06	9.68256e+06	9.53632e+06	9.39007e+06	9.24382e+06	9.09757e+06	8.95133e+06	8.80508e+06	8.65883e+06	8.51259e+06	0	0	0	0	0
US	singori4	1400	0	0	0	0	1.01213e+07	9.97506e+06	9.82881e+06	9.68256e+06	9.53632e+06	9.39007e+06	9.24382e+06	9.09757e+06	8.95133e+06	8.80508e+06	8.65883e+06	8.51259e+06	0	0	0	0	0
US	singori5	1400	0	0	0	0	0	9.97506e+06	9.82881e+06	9.68256e+06	9.53632e+06	9.39007e+06	9.24382e+06	9.09757e+06	8.95133e+06	8.80508e+06	8.65883e+06	8.51259e+06	8.36634e+06	0	0	0	0
US	singori6	1400	0	0	0	0	0	9.97506e+06	9.82881e+06	9.68256e+06	9.53632e+06	9.39007e+06	9.24382e+06	9.09757e+06	8.95133e+06	8.80508e+06	8.65883e+06	8.51259e+06	8.36634e+06	0	0	0	0
Figure. Nuclear power generation & capacity factor

## Sheet: RES CF
# Title: Capacity factors of renewable tech by province
# Units: Unitless
# ----------
Province	PV	Rooftop_PV	Onshore_Wind	Offshore_Wind
SU	0.14	0.2	0.23	0
IC	0.13	0.2	0.12	0
DJ	0.13	0.2	0.23	0
DG	0.14	0.2	0.24	0
GJ	0.14	0.2	0.23	0
BS	0.15	0.2	0.06	0
US	0.11	0.2	0.16	0
GG	0.13	0.2	0.12	0
GW	0.12	0.2	0.25	0
CB	0.13	0.2	0.23	0
CN	0.13	0.2	0.17	0
JB	0.14	0.2	0.12	0
JN	0.15	0.2	0.17	0
GB	0.14	0.2	0.24	0
GN	0.14	0.2	0.19	0
JJ	0.13	0.2	0.22	0

## Sheet: Floorspace
# Title: Floorspace in 2011
# Unit: Billion m^2
# Source: http://open.eais.go.kr/ (accessed: 9/16/19)
# ----------
Province	resid	comm
SU	0.390047	0.209472
IC	0.089643	0.062172
DJ	0.080251	0.042177
DG	0.082273	0.053394
GJ	0.049846	0.032625
BS	0.155004	0.075771
US	0.037473	0.034893
GG	0.459389	0.29907
GW	0.055683	0.047699
CB	0.058816	0.052713
CN	0.10303	0.07876
JB	0.073149	0.055939
JN	0.068481	0.058427
GB	0.113976	0.099824
GN	0.112294	0.105116
JJ	0.017806	0.019856
Figure. Commercial and Residential Floorspace

[truncated: 4 more sheets: HDDCDD, Cement&Fert VoS, Inputs to heat, Bunkering]
